# Supplementary material for: Basis approach to estimate the instantaneous frequencies in multicomponent AM-FM signals
Source: Springer Nature journal article supplement (doi:10.1186/1687-4722-2014-8), 2014-03-05
Supplement: 13636_2013_103_MOESM4_ESM.pdf [file 13636_2013_103_MOESM4_ESM.pdf]

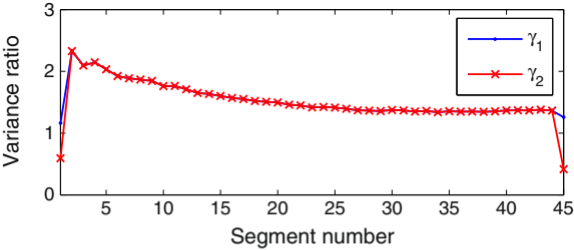

(a)

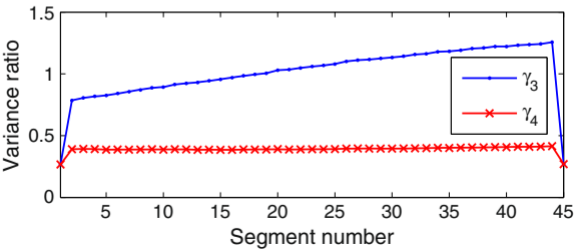

(b)
